# Supplementary material
Source: PubMed Central journal article supplement (PMC7879019)
Supplement: mmc1.pdf [file mmc1.pdf]

## Supplementary Materials

Table 1

*Sociodemographic Information of the Sample*

|                                     | <i>N</i> = 1050 |
|-------------------------------------|-----------------|
| Age                                 |                 |
| Mean (SD)                           | 39.84 (13.97)   |
| Min-Max                             | 18-78           |
| Gender (%)                          |                 |
| Male                                | 42.3            |
| Female                              | 57.0            |
| Gender Nonconforming                | 0.7             |
| Race (%)                            |                 |
| White                               | 77.4            |
| Black of African American           | 7.6             |
| American Indian or Alaskan Native   | 0.9             |
| Asian                               | 8.9             |
| Native Hawaiian or Pacific Islander | 0.6             |
| Other                               | 4.5             |
| Ethnicity (%)                       |                 |
| Hispanic or LatinX                  | 10.6            |
| Region (%)                          |                 |
| Urban                               | 31.8            |
| Suburban                            | 51.0            |
| Rural                               | 17.1            |
| Political Ideology <sup>a</sup>     |                 |
| Mean (SD)                           | 4.43 (1.72)     |

*Note.* Before proceeding with analyses, we dichotomized two of our categorical variables, which were subject to small *n*'s in certain categories, to maintain appropriate power. We grouped region into "urban" and "not urban" (combining rural and suburban), and only included those who identified as "males" and "females", as our gender nonconforming category only included *n* = 7 participants. Additionally, we grouped together individuals who did not identify as either White, Black, or Asian into an "Other" racial category for comparing these racial groups. <sup>a</sup>Rated on a 1-7 scale where higher scores reflect more liberal political ideology while lower scores reflect more conservative political ideology.

Table 2

*Correlations Between Psychosocial Factors and Sociodemographic Variables*

|                                    | 1.     | 2.      | 3.      | 4.     | 5.      | 6.      | 7.     | 8.    | 9.      | 10.    |
|------------------------------------|--------|---------|---------|--------|---------|---------|--------|-------|---------|--------|
| 1. Belief in mask effectiveness    |        |         |         |        |         |         |        |       |         |        |
| 2. Belief in Science               | .28*** |         |         |        |         |         |        |       |         |        |
| 3. Age                             | .01    | -.07*   |         |        |         |         |        |       |         |        |
| 4. Political Ideology <sup>a</sup> | .28*** | .45***  | -.16*** |        |         |         |        |       |         |        |
| 5. Gender <sup>b</sup>             | -.03   | -.15*** | .07*    | -.01   |         |         |        |       |         |        |
| 6. Race: White <sup>c</sup>        | .08*   | -.01    | -.17*** | .07*   | -.08*   |         |        |       |         |        |
| 7. Race: Black <sup>c</sup>        | -.06†  | .05     | .03     | -.03   | .07*    | -.54*** |        |       |         |        |
| 8. Race: Asian <sup>c</sup>        | -.09** | -.05†   | .14***  | -.05†  | .02     | -.58*** | -.09** |       |         |        |
| 9. Race: Other <sup>c</sup>        | .04    | .03     | .10**   | -.03   | .05     | -.47*** | -.07*  | -.08* |         |        |
| 10. Ethnicity <sup>d</sup>         | .00    | .07*    | -.10**  | .02    | -.13*** | .16***  | .03    | .06*  | -.38*** |        |
| 11. Region <sup>e</sup>            | -.04   | -.11*** | .10**   | -.09** | .16***  | -.15*** | .15*** | .02   | .08**   | -.10** |

*Note.* <sup>a</sup>Higher scores reflect more liberal political ideology while lower scores reflect more conservative political ideology <sup>b</sup>Gender was coded male = 1, female = 2. <sup>c</sup>Race was coded as white = 1, race specified category = 2. <sup>d</sup>Ethnicity was coded as not Hispanic or LatinX = 1, Hispanic or LatinX = 2. <sup>e</sup>Region was coded as urban = 1, not urban = 2. † $p < .10$ , \* $p < .05$ , \*\* $p < .01$ , \*\*\* $p < .001$ .
